# Supplementary figures and images for: A diverse set of microRNAs and microRNA-like small RNAs in developing rice grains
Source: HighWire-hosted journal article supplement (doi:10.1101/gr.075572.107), 2008-08-07

Supplemental Figure 1

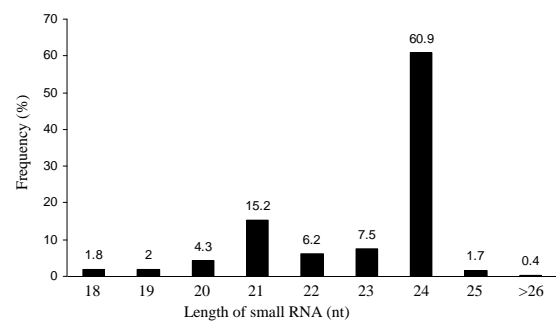

Supplement: Zhu_Suppl_Fig_1.pdf [file Zhu_Suppl_Fig_1.pdf]
